# Supplementary material
Source: MDPI journal article supplement (https://www.mdpi.com/2073-4441/12/12/3587)
Supplement: s1 [file s1]

## Supplementary Figures

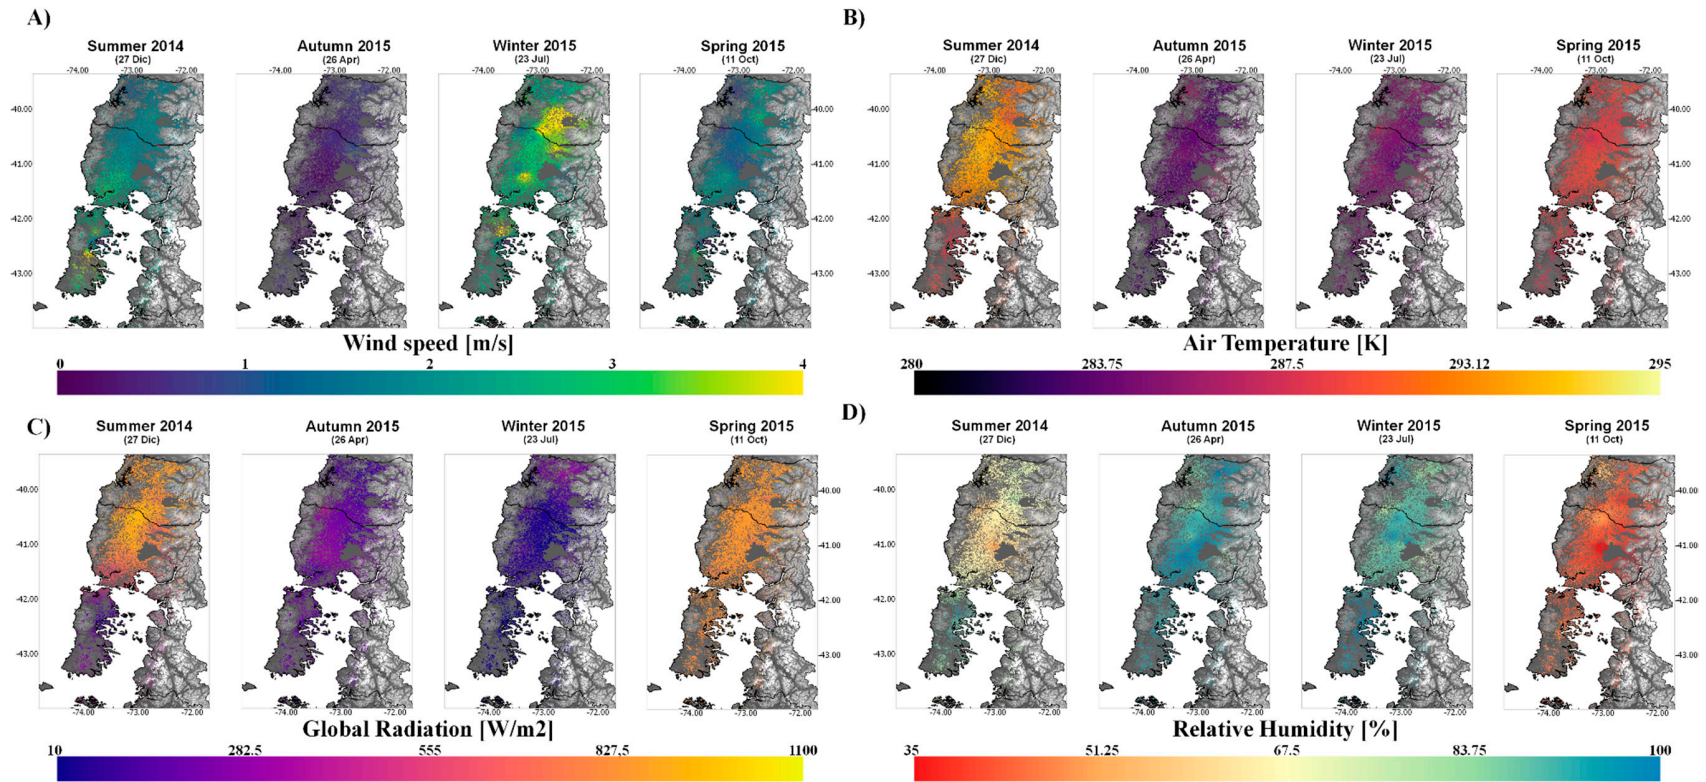

**Figure S1.** Meteorological data for the study area. A) is the wind speed [m s<sup>-1</sup>], B) air temperature [K], C) instantaneous global radiation [W m<sup>-2</sup>] y D) relative humidity [%]. The meteorological information is on a topography layer of the región represented in gray

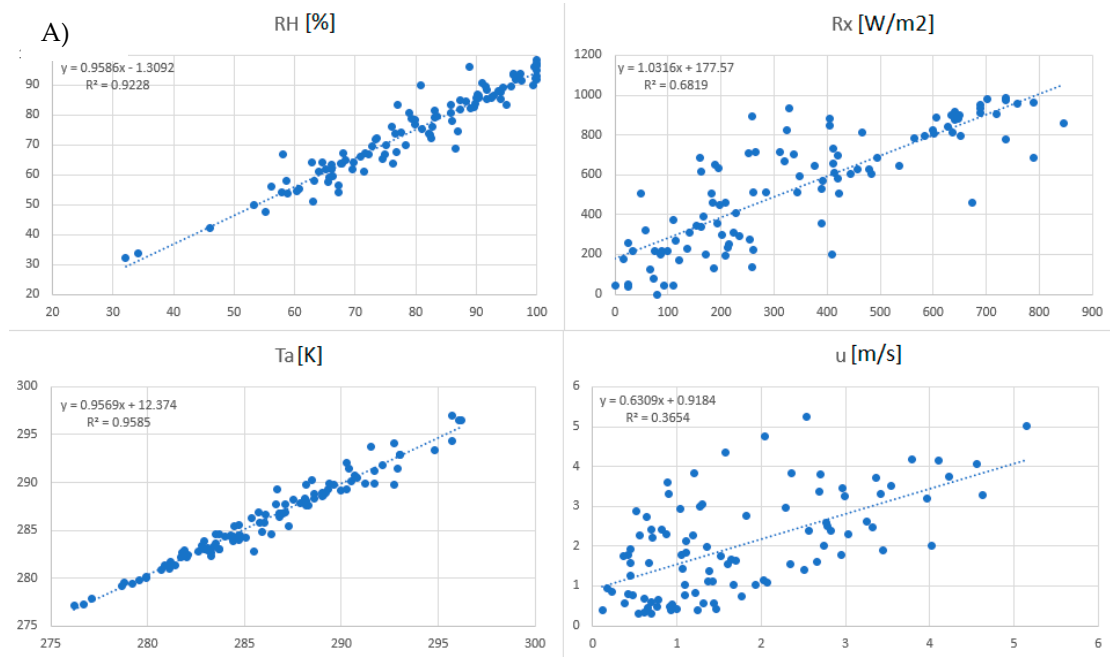

| B)                     | Bias    | Sigma      | RMSE   |
|------------------------|---------|------------|--------|
| RH [%]                 | 4.59    | 4.19       | 6.21   |
| Rx [W/m <sup>2</sup> ] | -188.52 | 161.801882 | 248.44 |
| Ta [K]                 | -0.025  | 0.9        | 0.91   |
| u [m/s]                | -0.31   | 1.11       | 1.16   |

**Figure S2.** Validation of relative humidity (RH), global radiation (Rx), air temperature (Ta) and wind speed (u). **A).** Scatterplot of RH, Rx, Ta and u in Oromo Calibration Site (x-axis) and spatially interpolated variables (y-axis). **B)** Evaluation of bias, sigma and RMSE at pixel scale over OCS

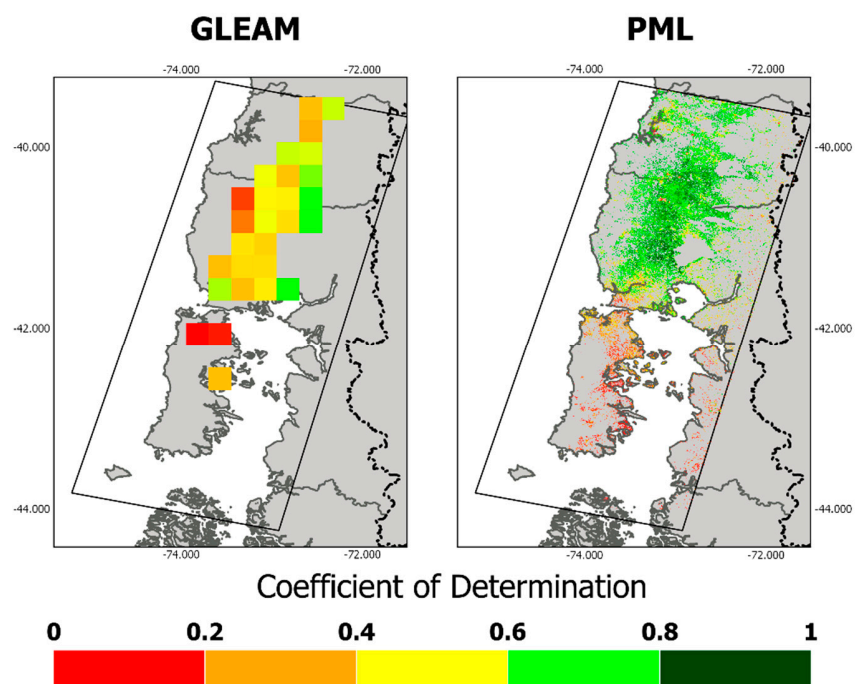

**Figure S3.** Spatial correlation between global models (GLEAM and PML) and SSEBop model.
